# Supplementary material for: Pesticide Translocation Using Nonpressurized and Pressurized Endotherapeutic Treatments in Coconut Palms
Source: MDPI journal article supplement (doi:10.3390/horticulturae10040386), 2024-04-11
Supplement: s1 [file s1]

# Supplementary Material

## Pesticide translocation using nonpressurized and pressurized endotherapeutic treatments in coconut palms

Jordana A. Ferreira, Joana M. S. Ferreira, Aline de H. N. Maia, Paulo M. P. Lins, Carla B. G. Bottoli

**Table S1.** Morphological characteristics of the coconut palms used in the **pressurized** or **nonpressurized** endotherapy treatments.

| Endotherapy treatment | Time after application (days) | Replication (palm tree) | Characteristics of the coconut palms |                  |             |                |
|-----------------------|-------------------------------|-------------------------|--------------------------------------|------------------|-------------|----------------|
|                       |                               |                         | Number of bunches                    | Number of leaves | Stem length | Stem thickness |
| Pressurized           | 2                             | 1                       | 15                                   | 22               | 200         | 70             |
|                       |                               | 2                       | 13                                   | 23               | 208         | 64             |
|                       |                               | 3                       | 16                                   | 22               | 228         | 71             |
|                       | 15                            | 1                       | 16                                   | 20               | 180         | 75             |
|                       |                               | 2                       | 13                                   | 21               | 210         | 86             |
|                       |                               | 3                       | 11                                   | 20               | 210         | 68             |
|                       | 30                            | 1                       | 11                                   | 18               | 212         | 80             |
|                       |                               | 2                       | 18                                   | 22               | 210         | 81             |
|                       |                               | 3                       | 13                                   | 22               | 200         | 76             |
|                       | 45                            | 1                       | 18                                   | 21               | 203         | 74             |
|                       |                               | 2                       | 8                                    | 21               | 213         | 66             |
|                       |                               | 3                       | 19                                   | 20               | 200         | 67             |
|                       | 2                             | 1                       | 15                                   | 22               | 180         | 64             |
|                       |                               | 2                       | 8                                    | 20               | 227         | 70             |
|                       |                               | 3                       | 10                                   | 20               | 200         | 80             |
| Nonpressurized        | 15                            | 1                       | 12                                   | 19               | 183         | 61             |
|                       |                               | 2                       | 16                                   | 22               | 193         | 63             |
|                       |                               | 3                       | 15                                   | 23               | 210         | 69             |
|                       | 30                            | 1                       | 14                                   | 22               | 215         | 63             |
|                       |                               | 2                       | 13                                   | 18               | 200         | 74             |
|                       |                               | 3                       | 18                                   | 20               | 224         | 71             |
|                       | 45                            | 1                       | 13                                   | 21               | 210         | 60             |
|                       |                               | 2                       | 13                                   | 20               | 222         | 68             |
|                       |                               | 3                       | 14                                   | 21               | 215         | 72             |

**Table S2.** Nominal significance level (p-value) of the F-tests used to compare the concentration means of the studied pesticides between the treatments pressurized and non-pressurized application at 50 and 100 cm above the application point and the average of the concentrations for both heights, at each measurement time.

| Pesticide      | Time (days) | F-test* p-value for each response variable |                         |                    |
|----------------|-------------|--------------------------------------------|-------------------------|--------------------|
|                |             | Concentration at 50 cm                     | Concentration at 100 cm | Mean concentration |
| Carbofuran     | 2           | 0,011                                      | 0,275                   | 0,063              |
|                | 15          | 0,202                                      | 0,267                   | 0,210              |
|                | 30          | 0,036                                      | 0,425                   | 0,078              |
|                | 45          | 0,344                                      | 0,210                   | 0,193              |
| Cyproconazole  | 2           | 0,761                                      | 0,633                   | 0,679              |
|                | 15          | 0,444                                      | 0,616                   | 0,486              |
|                | 30          | 0,385                                      | 0,577                   | 0,473              |
|                | 45          | 0,905                                      | 0,474                   | 0,758              |
| Difenoconazole | 2           | 0,874                                      | 0,722                   | 0,757              |
|                | 15          | 0,572                                      | 0,834                   | 0,685              |
|                | 30          | 0,296                                      | 0,826                   | 0,383              |
|                | 45          | 0,435                                      | 0,072                   | 0,299              |
| Imidacloprid   | 2           | 0,737                                      | 0,437                   | 0,612              |
|                | 15          | 0,161                                      | 0,186                   | 0,170              |
|                | 30          | 0,533                                      | 0,230                   | 0,364              |
|                | 45          | 0,816                                      | 0,229                   | 0,824              |
| Thiabendazole  | 2           | 0,708                                      | 0,153                   | 0,388              |
|                | 15          | 0,266                                      | 0,696                   | 0,299              |
|                | 30          | 0,376                                      | 0,411                   | 0,528              |
|                | 45          | 0,661                                      | 0,734                   | 0,677              |
| Thiamethoxam   | 2           | 0,073                                      | 0,330                   | 0,004              |
|                | 15          | 0,274                                      | 0,413                   | 0,293              |
|                | 30          | 0,397                                      | 0,795                   | 0,607              |
|                | 45          | 0,750                                      | 0,942                   | 0,838              |

\* F-test with 1 and 16 degrees of freedom (DF) of the numerator and denominator of the F statistic, respectively. Nominal significance values (p-values) inferior to 0.10 (in red) indicate a significant difference between treatments in the respective measurement times and height above the mixture application point.

**Table S3.** The mean concentration (n=3 plants) of the studied pesticides and respective standard errors in the treatments pressurized (P) and non-pressurized (NP) at 50 and 100 cm above the application point for each measurement time.

| Pesticide (i.a.) | Time (days) | Treatment | Mean pesticide concentration at two heights (n=3) |       |        |        |
|------------------|-------------|-----------|---------------------------------------------------|-------|--------|--------|
|                  |             |           | (µg kg <sup>-1</sup> )                            |       |        |        |
|                  |             |           | 50cm                                              | S.E.* | 100 cm | S.E.   |
| Carbofuran       | 2           | P         | 6756.0                                            | a     | 1492.3 | 2126.7 |
|                  |             | NP        | 2472.7                                            | b     | 93.7   | 1660.3 |
|                  | 15          | P         | 2407.6                                            |       | 905.8  | 1346.9 |
|                  |             | NP        | 1058.0                                            |       | 457.0  | 625.0  |
|                  | 30          | P         | 2354.5                                            | a     | 771.1  | 942.7  |
|                  |             | NP        | 470.3                                             | b     | 279.7  | 574.0  |
|                  | 45          | P         | 280.7                                             |       | 108.1  | 196.6  |
|                  |             | NP        | 167.7                                             |       | 41.5   | 118.0  |
|                  | 2           | P         | 1136.0                                            |       | 281.4  | 662.0  |
|                  |             | NP        | 1038.0                                            |       | 146.3  | 517.0  |
| Cyproconazole    | 15          | P         | 4688.5                                            |       | 2380.0 | 2068.9 |
|                  |             | NP        | 2598.1                                            |       | 1188.8 | 1540.7 |
|                  | 30          | P         | 2110.9                                            |       | 471.3  | 1405.0 |
|                  |             | NP        | 1678.0                                            |       | 114.8  | 1133.0 |
|                  | 45          | P         | 470.9                                             |       | 227.2  | 349.6  |
|                  |             | NP        | 500.0                                             |       | 74.6   | 420.7  |
|                  | 2           | P         | 6192.0                                            |       | 1688.3 | 3858.0 |
|                  |             | NP        | 5803.3                                            |       | 1729.5 | 2665.7 |
|                  | 15          | P         | 6928.6                                            |       | 4543.3 | 1606.8 |
|                  |             | NP        | 4087.0                                            |       | 1915.5 | 1888.7 |
| Difenoconazole   | 30          | P         | 7669.9                                            |       | 3241.6 | 1698.8 |
|                  |             | NP        | 4155.0                                            |       | 257.6  | 1482.3 |
|                  | 45          | P         | 2006.7                                            |       | 1113.1 | 480.2  |
|                  |             | NP        | 3012.0                                            |       | 579.8  | 1161.3 |
|                  | 2           | P         | 540.0                                             |       | 360.3  | 408.0  |
|                  |             | NP        | 403.7                                             |       | 172.8  | 242.7  |
|                  | 15          | P         | 1755.5                                            |       | 877.5  | 1195.9 |
|                  |             | NP        | 429.5                                             |       | 214.0  | 358.0  |
|                  | 30          | P         | 577.1                                             |       | 57.0   | 515.7  |
|                  |             | NP        | 438.3                                             |       | 209.9  | 305.0  |
| Imidaclopride    | 45          | P         | 134.3                                             |       | 67.8   | 63.0   |
|                  |             | NP        | 116.7                                             |       | 31.0   | 105.0  |
|                  | 2           | P         | 540.0                                             |       | 360.3  | 408.0  |
|                  |             | NP        | 403.7                                             |       | 172.8  | 242.7  |
|                  | 15          | P         | 1755.5                                            |       | 877.5  | 1195.9 |
|                  |             | NP        | 429.5                                             |       | 214.0  | 358.0  |

\* Standard error of the estimated mean concentration; means followed by different letters in the columns within each pesticide, treatment and time are significantly different by the ANOVA's F test at the 0.05 significance level.

**Table S3 (continuation).** The mean concentration (n=3 plants) of the studied pesticides and respective standard errors in the treatments pressurized (P) and non-pressurized (NP) at 50 and 100 cm above the application point for each measurement time.

| Pesticide (i.a.) | Time (days) | Treatment | Mean pesticide concentration at two heights (n=3) |         |        |       |
|------------------|-------------|-----------|---------------------------------------------------|---------|--------|-------|
|                  |             |           | (µg kg <sup>-1</sup> )                            |         |        |       |
|                  |             |           | 50cm                                              | S.E.*   | 100 cm | S.E.  |
| Thiabendazole    | 2           | P         | 374.0                                             | 253.6   | 354.0  | 183.1 |
|                  |             | NP        | 271.0                                             | 93.3    | 75.0   | 32.3  |
|                  | 15          | P         | 1333.5                                            | 613.0   | 164.7  | 73.5  |
|                  |             | NP        | 533.4                                             | 324.9   | 127.0  | 59.8  |
|                  | 30          | P         | 1004.7                                            | 365.3   | 71.1   | 34.1  |
|                  |             | NP        | 560.0                                             | 324.4   | 147.7  | 83.9  |
|                  | 45          | P         | 62.4                                              | 56.0    | 17.1   | 17.1  |
|                  |             | NP        | 34.3                                              | 28.3    | 10.7   | 7.2   |
| Thiamethoxam     | 2           | P         | 1550.0                                            | a 496.0 | 692.0  | 343.0 |
|                  |             | NP        | 581.3                                             | b 89.7  | 330.0  | 109.1 |
|                  | 15          | P         | 1415.9                                            | 717.0   | 322.6  | 186.7 |
|                  |             | NP        | 526.1                                             | 319.0   | 155.7  | 68.1  |
|                  | 30          | P         | 355.8                                             | 114.7   | 80.5   | 37.3  |
|                  |             | NP        | 218.0                                             | 109.0   | 99.3   | 61.1  |
|                  | 45          | P         | 21.3                                              | 21.3    | 16.7   | 16.7  |
|                  |             | NP        | 14.0                                              | 7.1     | 15.0   | 15.0  |

\* Standard error of the estimated mean concentration; means followed by different letters in the columns within each pesticide, treatment and time are significantly different by the ANOVA's F test at the 0.05 significance level.

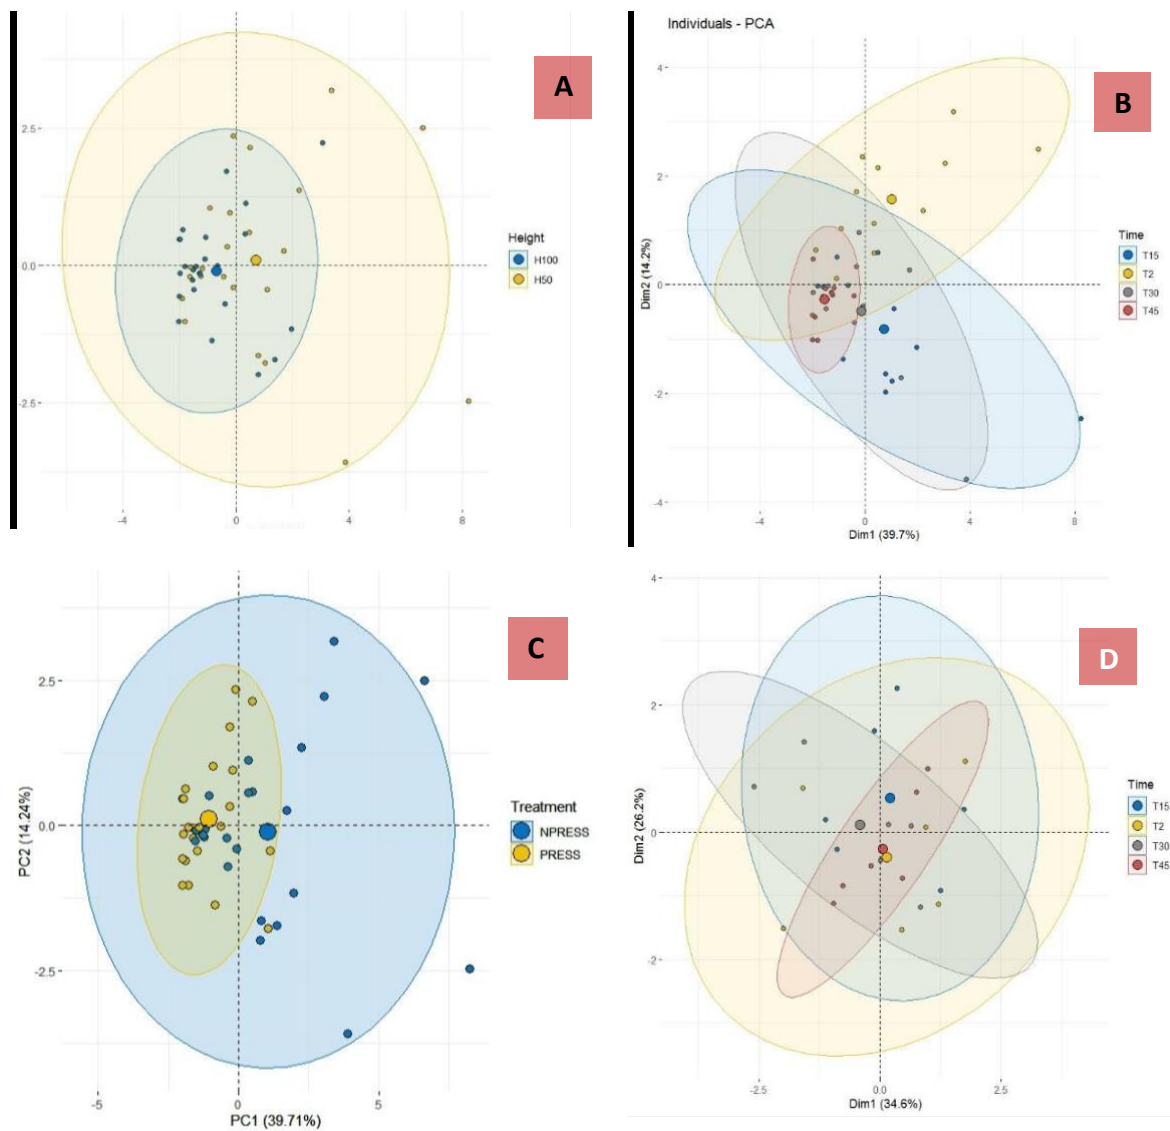

**Figure S1** - Results of PCA based on sets of variables related to the pesticide's mixture applied to coconut palm trees via pressurized or non-pressurized endotherapy, namely: concentrations of carbofuran, 3-OH-carbofuran, cyproconazole, difenoconazole, imidacloprid, thiabendazole, thiamethoxam, and spiroticlofen (A, B, and C) or, considering the mixture variables; the plant variables, as the number of bunches, leaves, length and stem thickness (D). The PCAs (Dimensions (Dim) 1 and 2) highlight groups formed by different heights (50 or 100 cm) above the mixture injection point, (A) sampled times (2, 15, 30, or 45 days) (B), or endotherapeutic treatments (pressurized or nonpressurized) (C and D).
